# Supplementary material for: Neutralization of the Plasmodium-encoded MIF ortholog confers protective immunity against malaria infection
Source: PubMed Central journal article supplement (PMC6045615; doi:10.1038/s41467-018-05041-7), 2018-07-13
Supplement: 41467_2018_5041_MOESM1_ESM.pdf [file 41467_2018_5041_MOESM1_ESM.pdf]

**Baeza Garcia A *et al.***

**Neutralization of the *Plasmodium*-encoded MIF Confers Protective Immunity against  
Malaria Infection**

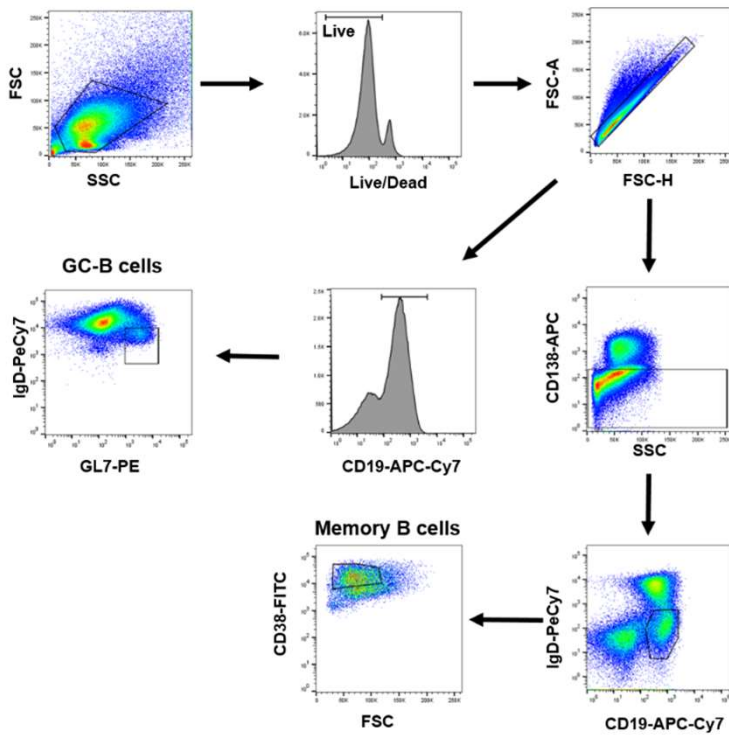

**Supplementary Figure 1. Deficient anti-*Plasmodium* antibody response and germinal center formation in the presence of PMIF.** Flow cytometry gating strategy used to identify germinal center B cells (CD19<sup>+</sup>IgD<sup>-</sup>GL7<sup>+</sup>) and memory B cells (CD19<sup>+</sup>CD138<sup>-</sup>IgD<sup>-</sup>CD38<sup>+</sup>).

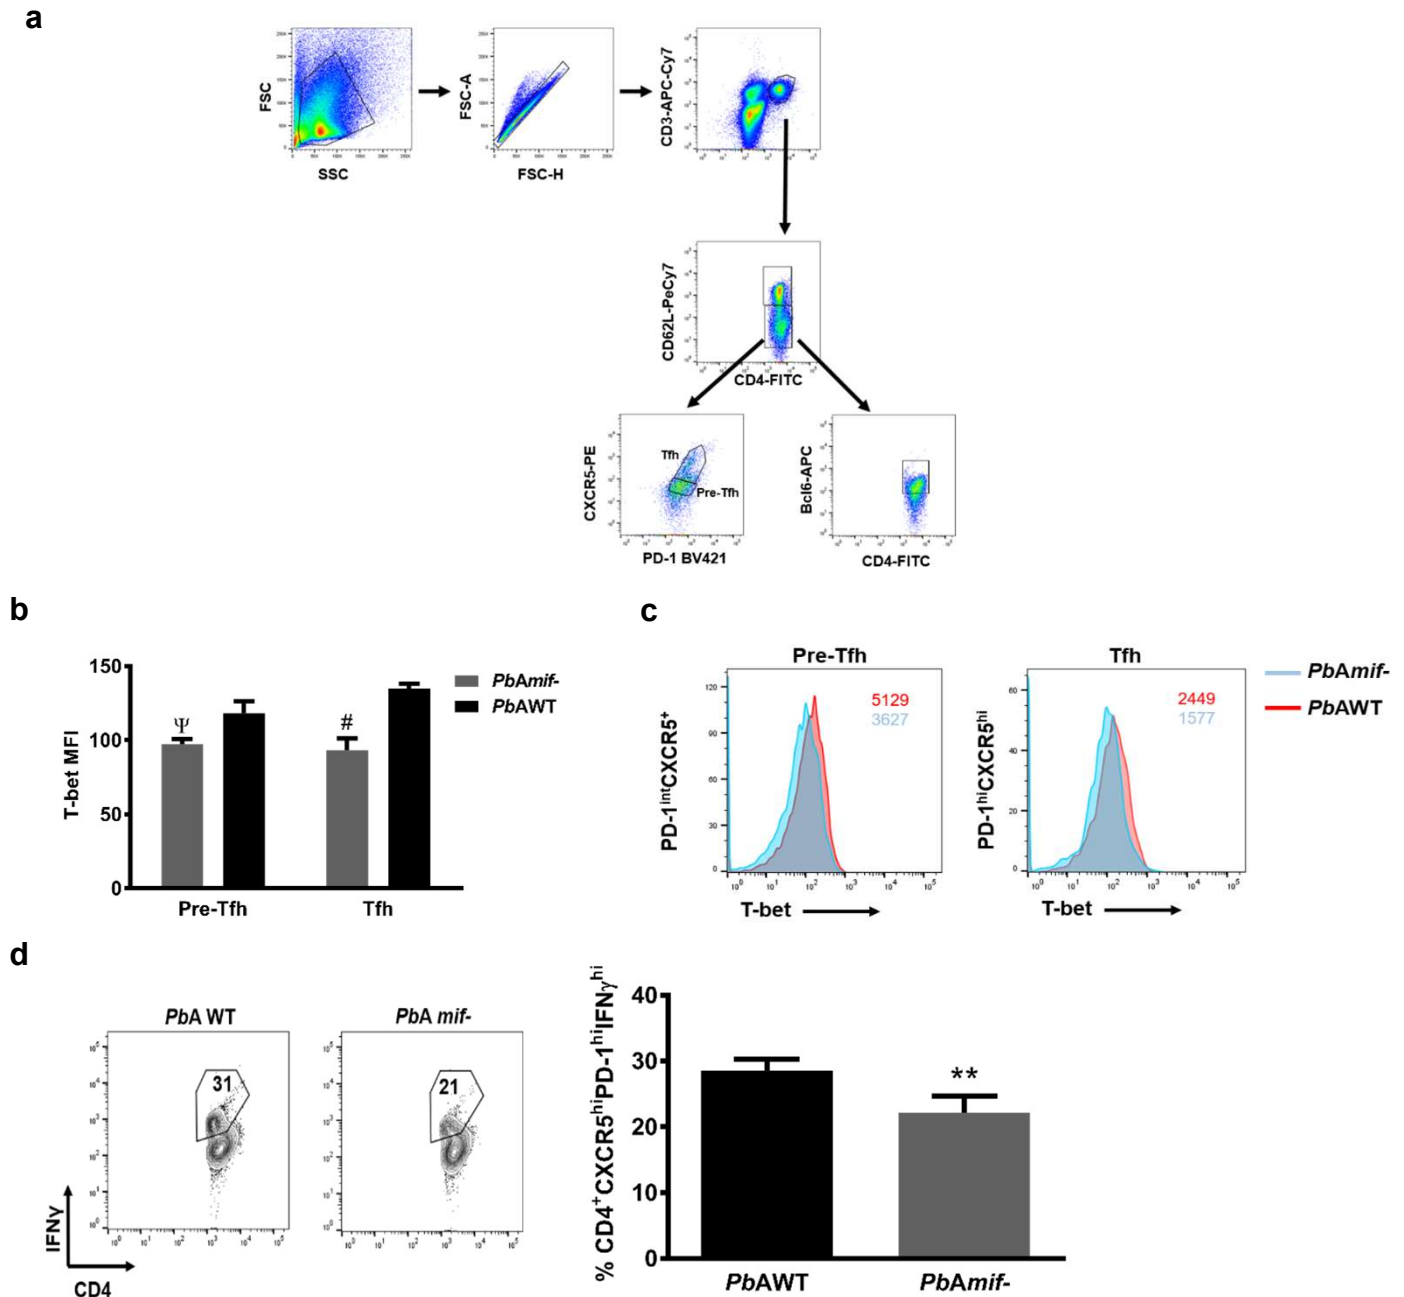

**Supplementary Figure 2. PMIF promotes T-bet and IFN- $\gamma$  expression during Tfh cell differentiation.** **a**, Flow cytometry gating strategy used to identify and immunophenotype pre-Tfh cells (CD4<sup>+</sup>CD62L-CXCR5<sup>int</sup>PD-1<sup>int</sup>) and Tfh cells (CD4<sup>+</sup>CD62L-CXCR5<sup>hi</sup>PD-1<sup>hi</sup>). BALB/cJ mice were infected with 10<sup>6</sup> *PbAWT* or *PbAmif*-iRBCs. On day 6, splenocytes were isolated and the expression of the transcription factor T-bet, **b** and **c** by pre-Tfh and Tfh cells was measured. Results are from three separate experiments. Bars represent the mean of 12 mice  $\pm$  SD.  $\Psi$  $p$ <0.001; # $p$ <0.0001 by two-way ANOVA. **d**, Percentage of Tfh cells expressing the pro-inflammatory cytokine IFN- $\gamma$ . Results are from three separate experiments. Bars represent the mean of 12 mice  $\pm$  SD; \*\* $p$ <0.05 by Mann-Whitney test.

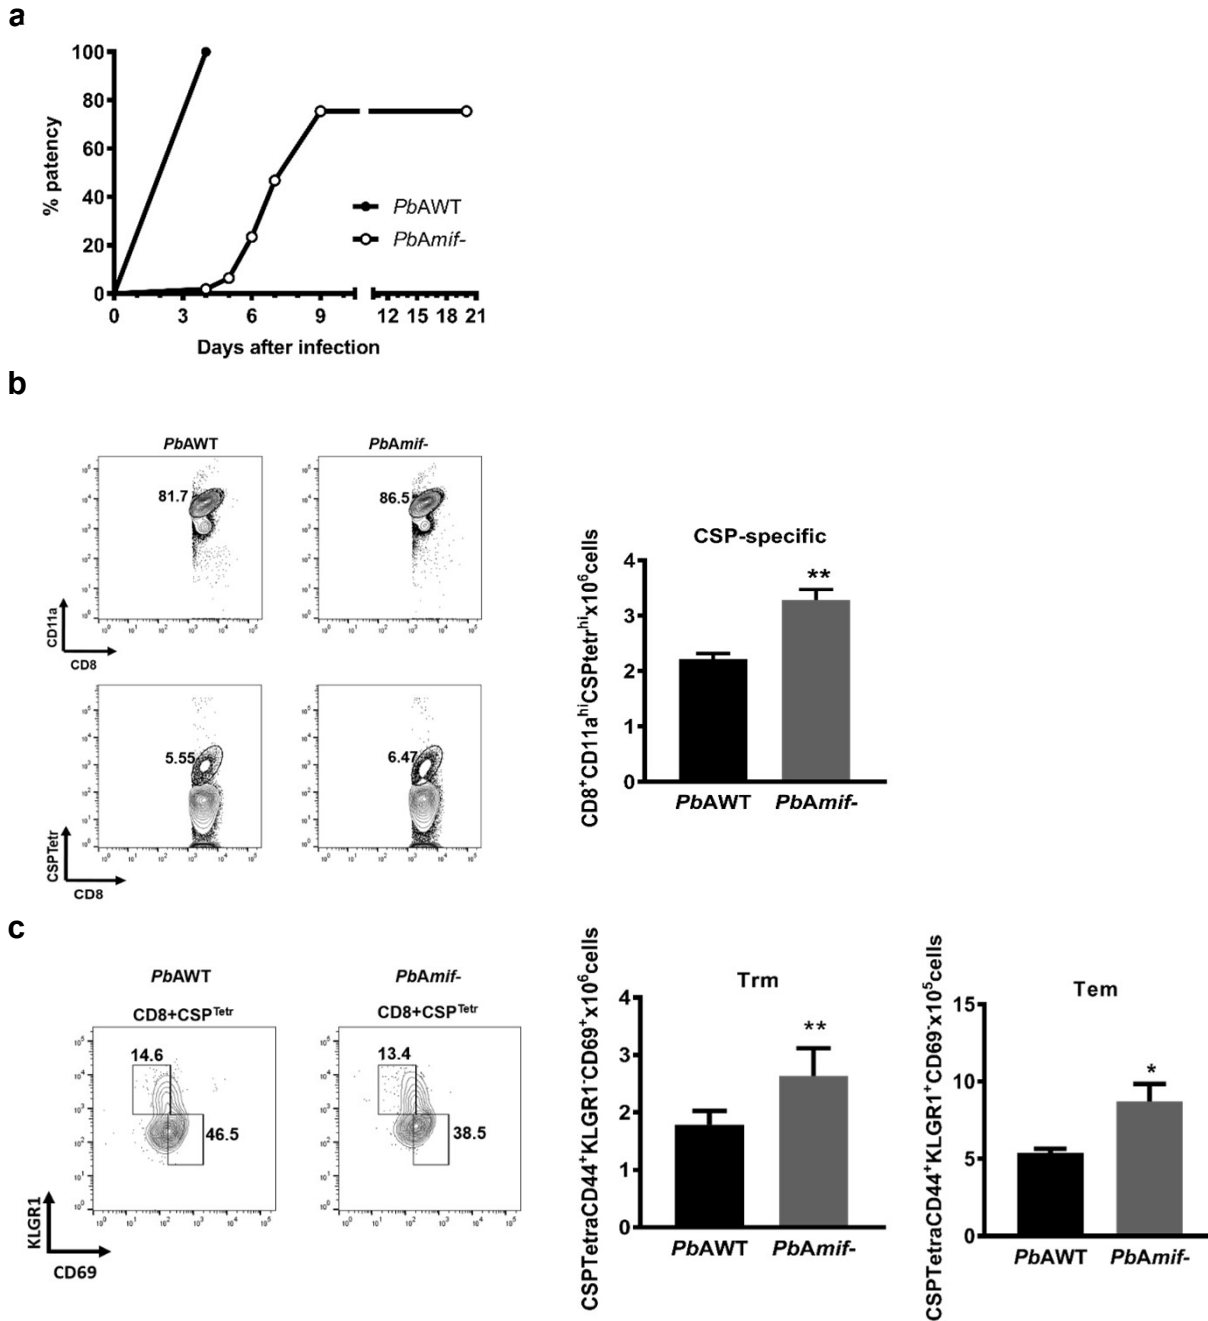

**Supplementary Figure 3. PMIF absence increases liver immunity against PbA.** **a**, Kaplan-Meier plots showing the percentage of BALB/cJ mice with blood-stage patency after challenge by i.v. injection with  $2 \times 10^3$  *PbAWT* (●) or *PbAmif-* (○) sporozoites. Patency was determined by microscopic enumeration of blood-stage patency by thin blood smears following day 3 of infection. Data are from two independent experiments, with 10 animals per group;  $p=0.0001$  by Log-rank (Mantel Cox) test. **b**, Representative plots and absolute numbers of CSP-specific CD8 T cells ( $CD8^+CD11a^{hi}CSP^{Tetra^{hi}}$ ) in the livers of BALB/cJ mice infected 7 days previously with  $2 \times 10^3$  *PbAWT* or *PbAmif-* sporozoites. Results are from two separate experiments. Bars represent the mean of 6 mice  $\pm$  SD;  $**p=0.0079$  by Mann-Whitney test. **c**, Representative plots and absolute numbers of CSP-specific tissue resident memory cells (Trm:  $CD8^+CD11a^{hi}CSP^{Tetra^{hi}}CD44^{hi}KLGR1^-CD69^+$ ) and effector memory CD8 T cells (Tem:  $CD8^+CD11a^{hi}CSP^{Tetra^{hi}}CD44^{hi}KLGR1^+CD69^-$ ) at day 7 after infection. Results are from two separate experiments. Bars represent the mean of six mice  $\pm$  SD;  $*p=0.0317$ ,  $**p=0.0079$  by Mann-Whitney test.

**a**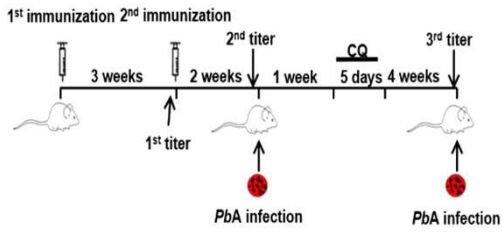**b**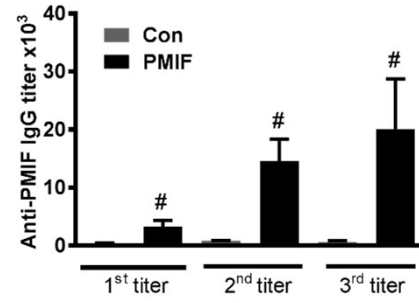**c**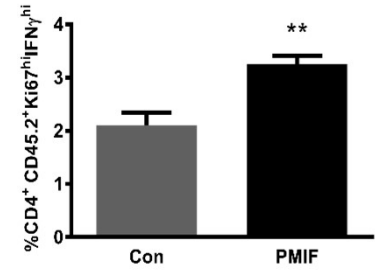**d**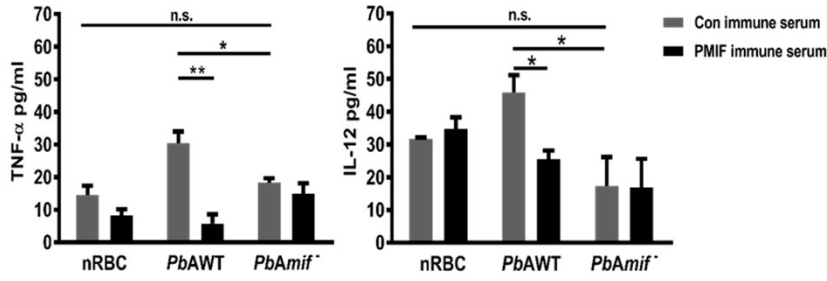**e**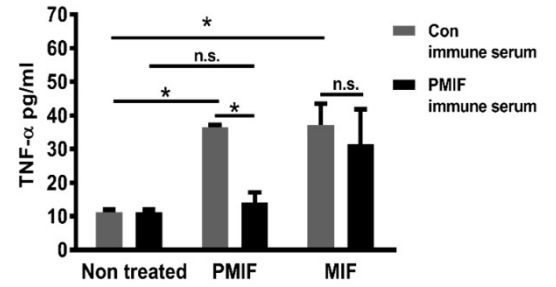**f**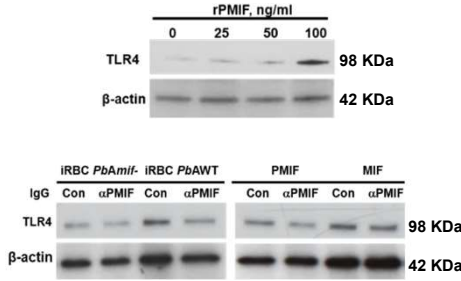**g**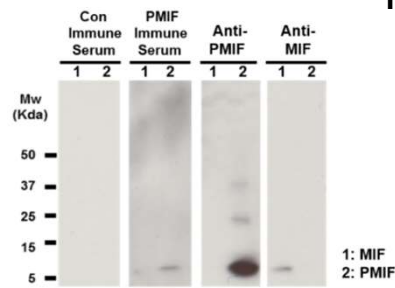**h**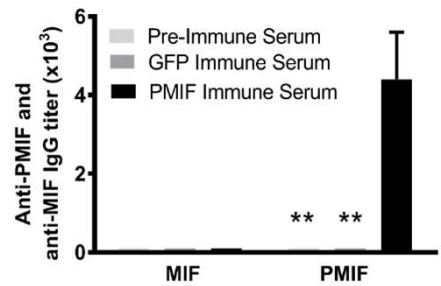**i**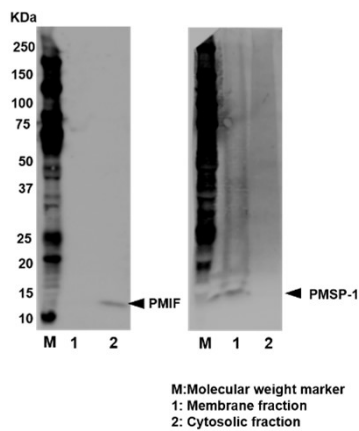**j**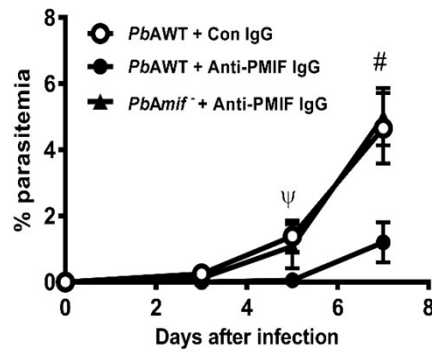

**Supplementary Figure 4. A self-amplifying RNA encoding PMIF elicits specific neutralizing anti-PMIF IgG and PMIF responsive CD4 T cells.** **a**, Experimental design: BALB/cJ mice were immunized at weeks 0 and 3 with a *pmif* or control (Con) RNA replicon and injected i.p. with  $10^6$  *Pb*AWT iRBCs. A cohort of infected mice was treated with chloroquine (CQ) on days 7–12 to eliminate parasites; mice were re-infected with  $10^6$  *Pb*AWT iRBCs 4 weeks later. **b**, Anti-PMIF immunoglobulin titers 3 weeks after first immunization (1<sup>st</sup> titer), 2 weeks after second immunization (2<sup>nd</sup> titer), and 5 weeks following infection (3<sup>rd</sup> titer). Results are from two separate experiments. Bars represent the mean of 10–15 mice  $\pm$  SD; # $p$ <0.0001 by Mann-Whitney test. **c**, Frequency of PMIF responsive CD4 T cells (Ki67<sup>hi</sup>CD4<sup>+</sup>) expressing IFN- $\gamma$  in the spleens of *pmif* or control RNA immunized mice isolated 15 days after second immunization and stimulated *ex vivo* with recombinant PMIF in the presence of CD45.1 splenic antigen-presenting cells and Brefeldin A. Data are from two independent experiments. Bars represent the mean of 6 mice  $\pm$  SD; \*\* $p$ <0.01 between PMIF vs. GFP control by 2-tailed Mann-Whitney test. **d**, TNF- $\alpha$  and IL-12 content in supernatants from murine bone marrow-derived macrophages ( $10^6$  per well) after stimulation for 18 hrs with uninfected RBCs (nRBCs), RBCs infected with *Pb*AWT, or RBCs infected with *PbAmif*- (each at 20 iRBCs per macrophage) in the presence of control (Con) immune serum or PMIF immune serum (2  $\mu$ l per ml). Data shown are mean  $\pm$  SD of three independent experiments performed in duplicate; \* $p$ <0.05 and \*\* $p$ <0.01 between PMIF vs. Con immune serum by Mann-Whitney test. **e**, TNF- $\alpha$  content in supernatants from bone marrow-derived macrophages ( $10^6$  per well) after stimulation for 18 hrs with PMIF or MIF, each at 100 ng/ml, in the presence of PMIF or Con immune serum (2  $\mu$ l per ml); \* $p$ <0.05 and n.s.: non-significant by Mann-Whitney test. **f**, (*upper*) TLR4 protein production by murine Bone Marrow-Derived Macrophages (BMDM) after stimulation *in vitro* for 18 hrs with rMIF. (*lower*) Impact of anti-PMIF IgG ( $\alpha$ PMIF) on TLR4 production in BMDMs induced by treatment with *PbAmif*- or *Pb*AWT iRBC lysates (*left panel*) or recombinant PMIF or murine MIF (*right panel*). Lysates or recombinant proteins were incubated with 100  $\mu$ g/ml of IgG (RT, 1 hr) purified from mice immunized with a control (Con) or PMIF-expressing RNA replicon ( $\alpha$ PMIF), added to BMDM for 18 hrs, and the BMDM lysates probed for the presence of TLR4.  $\beta$ -actin was used as a loading control. **g**, Detection of recombinant PMIF or mouse MIF by immunoblotting using serum from mice immunized with replicons encoding control RNA or PMIF RNA. Polyclonal antibodies raised to PMIF (Anti-PMIF) and mouse MIF (Anti-MIF) served as positive controls. *Lane 1*: recombinant mouse MIF, *Lane 2*: recombinant PMIF, both at 100 ng per lane. **h**, Detection of anti-PMIF and anti-MIF immunoglobulin titers in pre-immune, PMIF, and Con immune serum. Titers were determined by ELISA using immobilized recombinant PMIF or mouse MIF and expressed as the mean of anti-PMIF or anti-MIF titers in all studied mice. Data are from two independent experiments. Bars represent the mice of 10 animals  $\pm$  SD; \*\* $p$ <0.01 by Mann-Whitney test. **i**, Detection of PMIF (*left*) and PMSP-1 (*right*) in merozoites membrane and cytosolic fractions. *Lane 1*: membrane fraction, *Lane 2*: cytosolic fraction. **j**, Control (Con) or Anti-PMIF IgG (200  $\mu$ l dosed at 1 mg/ml) was administrated i.p. to naïve BALB/cJ mice on days -1, 1, 2, and 3 post-infection with  $10^6$  *Pb*AWT or *PbAmif*- iRBCs and parasitemia followed by flow cytometry. Data are from two independent experiments. Bars represent the mean of 8 mice  $\pm$  SD;  $\Psi$   $p$ <0.001; # $p$ <0.0001 by two-way ANOVA.

**a**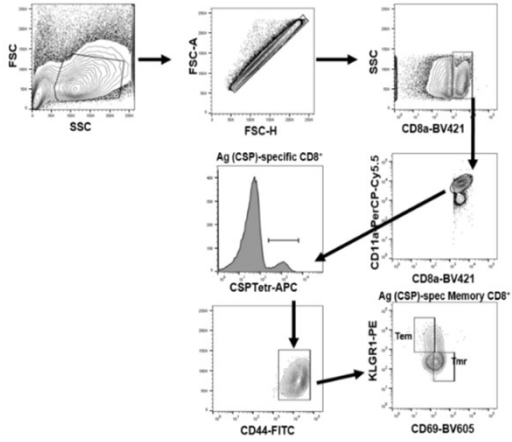**b**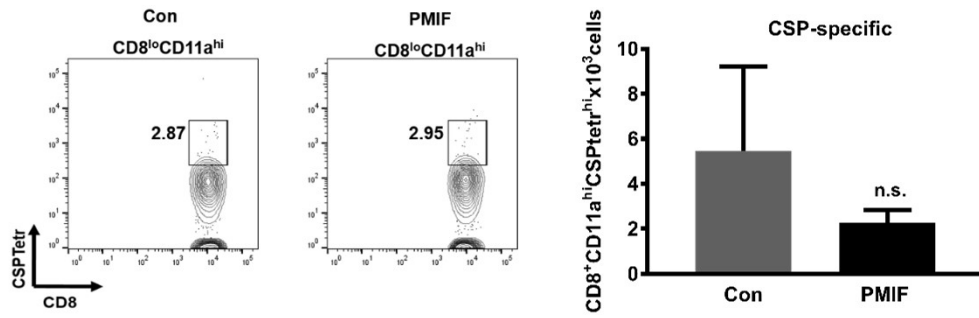**c**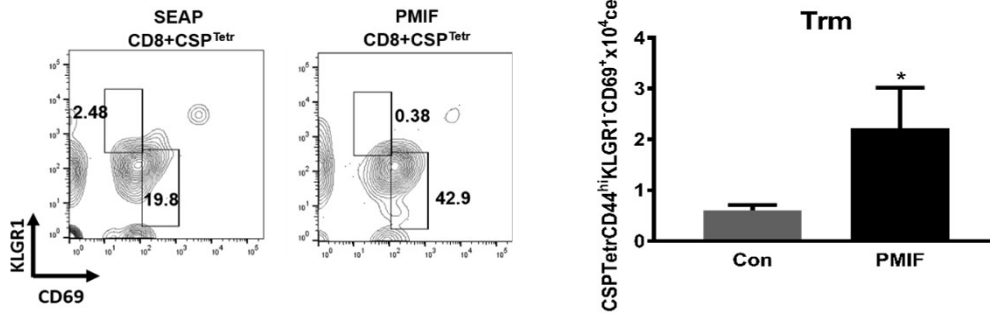**d**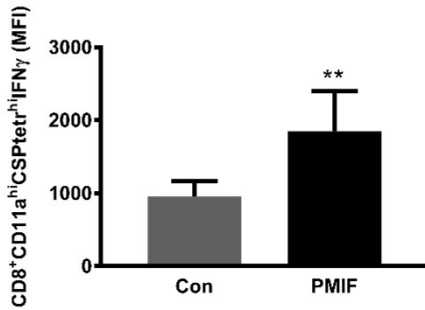

**Supplementary Figure 5. PMIF neutralization enhances the development of *Plasmodium* liver memory CD8 T cells.** Mice immunized with replicons encoding Con RNA or PMIF RNA were challenged with 2000 *Pb*AWT sporozoites by i.v injection. On day 7 after first or second infection, splenocytes were isolated and the percentage and total number of CD8 T cells measured. **a**, Representative plots and absolute numbers of CSP-specific CD8 T cells (CD8<sup>+</sup>CD11a<sup>hi</sup>CSPTetr<sup>hi</sup>) in the spleens of Con and PMIF immunized mice. Results are from two separate experiments. Bars represent the mean of 6 mice  $\pm$  SD; n.s.= non-significant by Mann-Whitney test. **b**, Representative plots and absolute number of liver CSP-specific tissue resident memory CD8 T cells (Trm: CSPTetrCD44<sup>hi</sup>KLGR1-CD69<sup>+</sup>) at day 30 after first infection. Results are from two separate experiments. Bars represent the mean of 6 mice  $\pm$  SD; \*p=0.0152 by Mann-Whitney test. **c**, IFN $\gamma$  expression (MFI) by CD8 Trm cells in the liver of Con and PMIF immunized mice 7 days after first infection with *Pb*AWT sporozoites. Results are from two separate experiments. Bars represent the mean of 6 mice  $\pm$  SD; \*\*p=0.0087 by Mann-Whitney test.



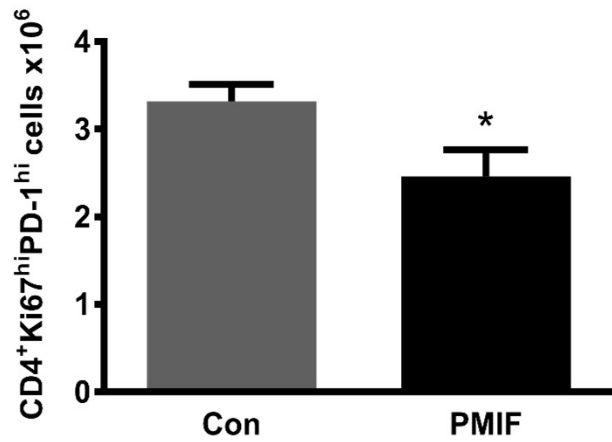

**Supplementary Figure 6. Quantitation of *Pb*AWT responsive splenic CD4 T cells expressing PD-1, 7 days after infection in mice immunized with RNA replicons encoding Con RNA or PMIF RNA.** Data are representative of two independent experiments. Bars represent the mean of 10 mice  $\pm$  SD; \* $p$ <0.05 by Mann-Whitney test.

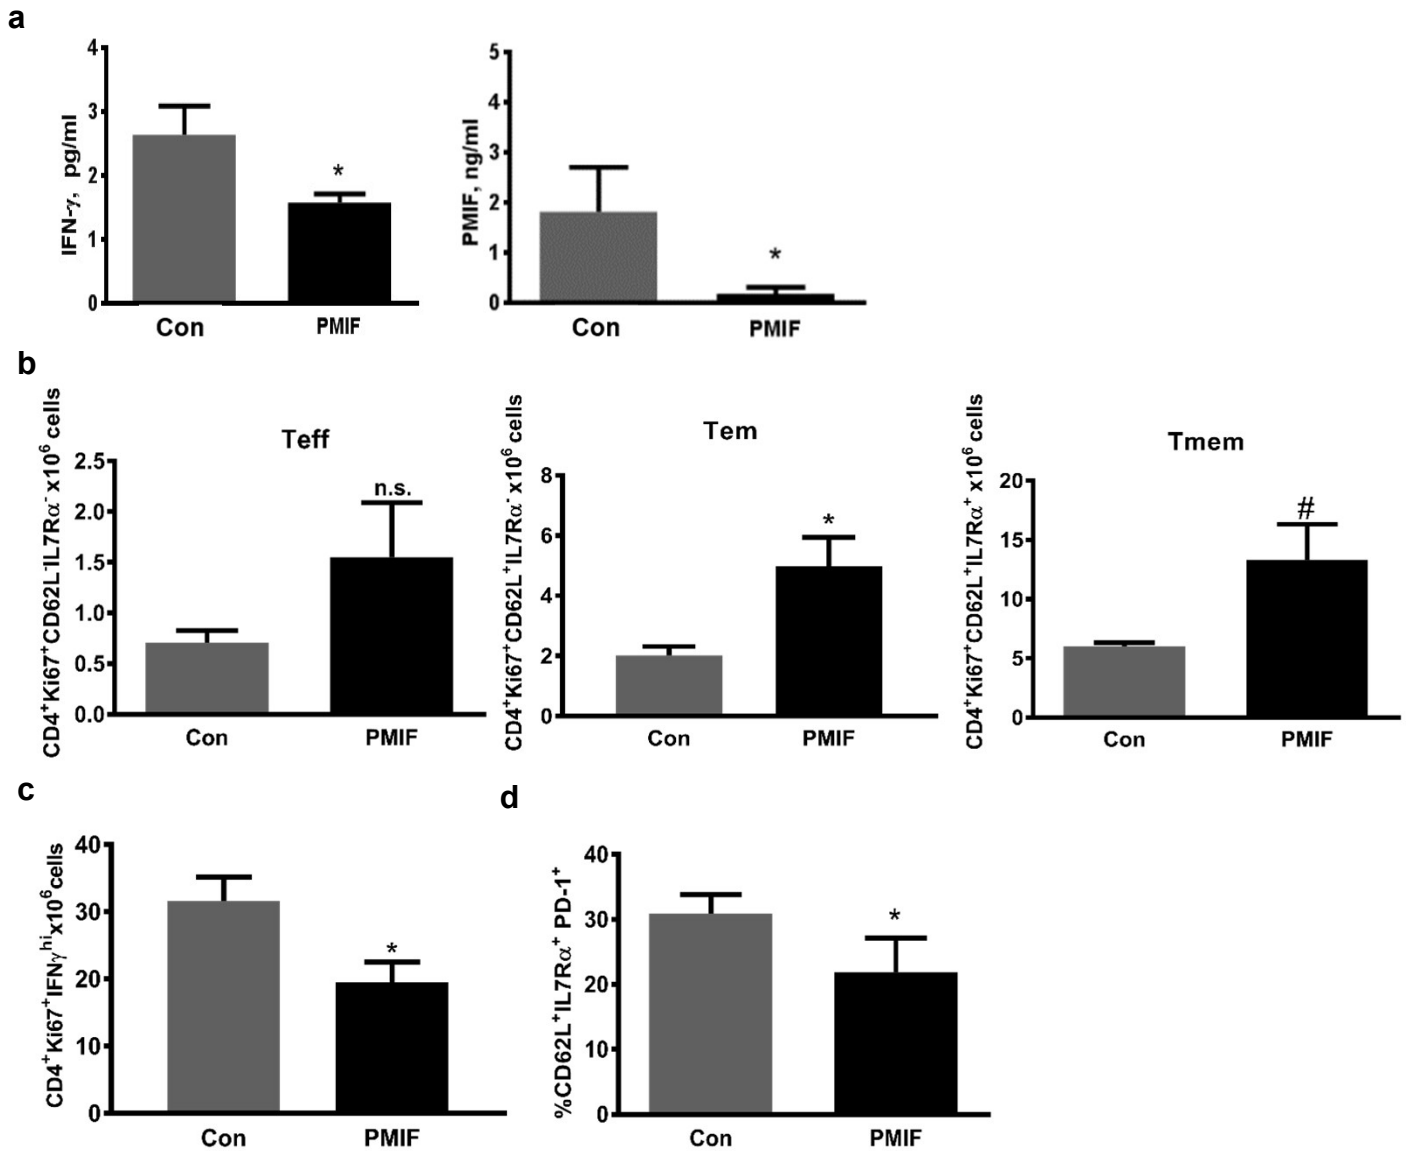

**Supplementary Figure 7. Increased of CD4 T cell memory response and decreased T cell exhaustion in PMIF immunized mice.** BALB/cJ mice were immunized with replicons encoding Con RNA or PMIF RNA, infected with  $10^6$  *Pb*AWT iRBCs, and cured by chloroquine treatment 1 week later (see Suppl. Fig. 4a). Four weeks later, mice were re-infected with  $10^6$  *Pb*AWT iRBCs and the splenic CD4 T cells isolated for analysis 7 days later. **a**, Serum levels of IFN- $\gamma$  and PMIF 7 days after second challenge infection in mice immunized with PMIF versus Con RNA. Data are representative of two independent experiments. Bars represent the mean of 6 mice  $\pm$  SD; \* $p$ <0.05 by 2-tailed Mann-Whitney test. **b**, Quantitation of *Pb*AWT responsive CD4 T cell (Ki67<sup>+</sup>CD4<sup>+</sup>) subsets, including T effector (Teff): CD62L-IL7R $\alpha$ <sup>-</sup>, T effector memory (Tem): CD62L-IL7R $\alpha$ <sup>-</sup>, and T memory (Tmem): CD62L<sup>+</sup>IL7R $\alpha$ <sup>+</sup>. The contribution of each memory CD4 T cell subset is expressed relative to the total number of *Pb*AWT responsive CD4 T cells. **c**, Number of *Pb*AWT responsive CD4 T cells (CD4<sup>+</sup>Ki67<sup>+</sup>) expressing IFN- $\gamma$  in the spleens of immunized mice. **d**, Frequency of CD4 Tmem (CD62L<sup>+</sup>IL7R $\alpha$ <sup>+</sup>) cells expressing PD-1. Data are representative of two independent experiments. Bars represent the mean of 10 mice  $\pm$  SD; n.s.: non significant; \* $p$ <0.05, # $p$ <0.0005 by Mann-Whitney test.

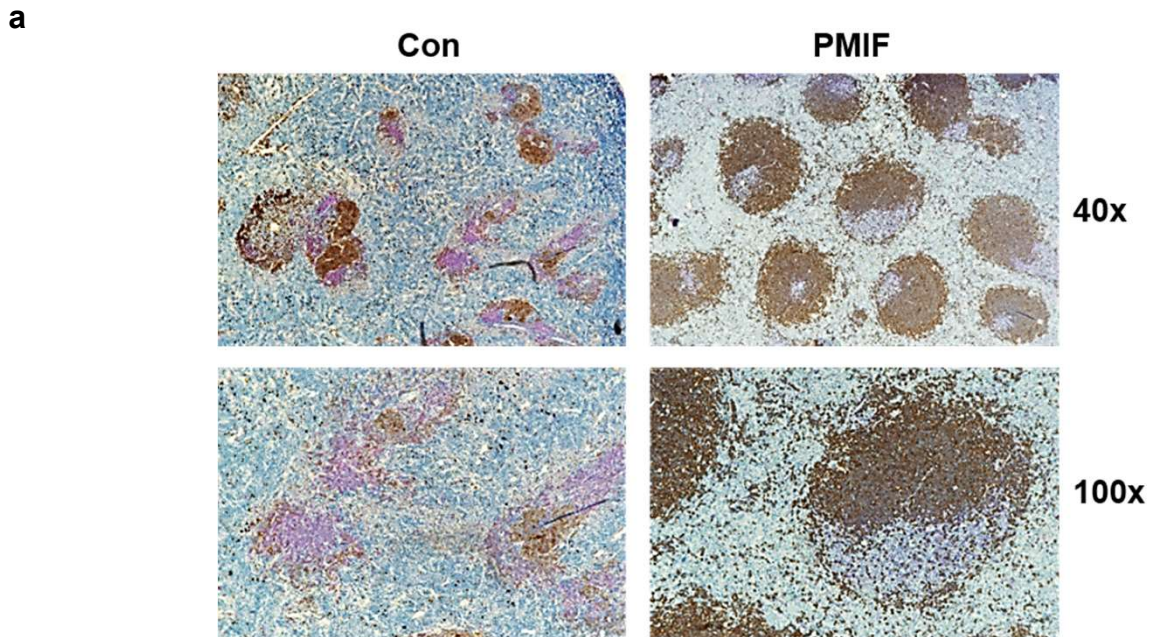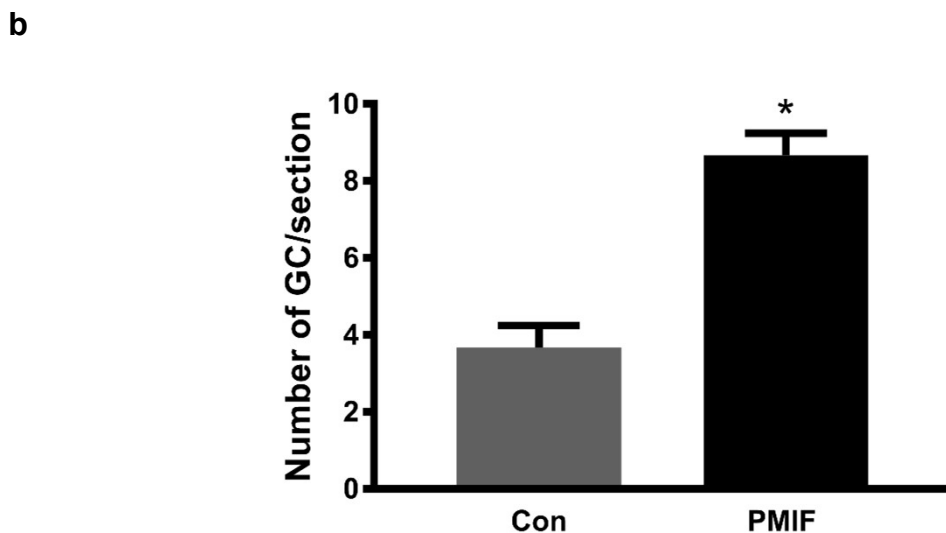

**Supplementary Figure 8.** Immunohistochemistry of spleens from mice 15 days after infection with  $10^6$  *Pb*AWT iRBCs and previously immunized with *pmif* RNA or Con RNA replicons. Immunostaining with anti-CD3 (red) and anti-B220 (brown). **a**, Top images for each group show representative regions of spleens (x40) and lower images show a single representative splenic follicle (x100). Data are representative of 4 sections from 2 mice from each experimental group. **b**, Number of germinal centers (GC) in spleens from mice 15 days after infection and previously immunized with PMIF and Con RNA. A GC was enumerated when the limit between the B cell zone (brown) and T cell zone (red) is clearly defined. Data are representative of 3 sections counted from 3 mice per group; mean  $\pm$  SD with \* $p < 0.05$  by 2-tailed Mann-Whitney test.

**a**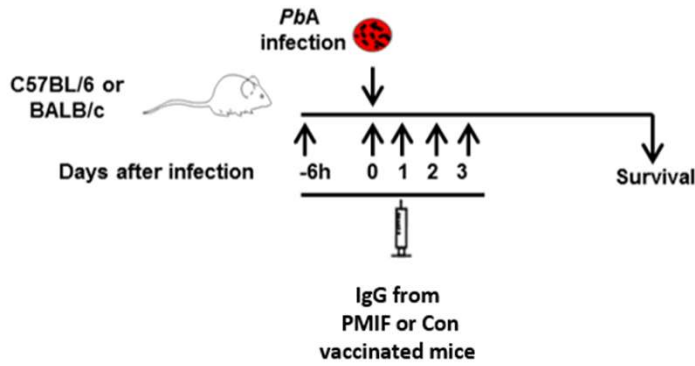**b**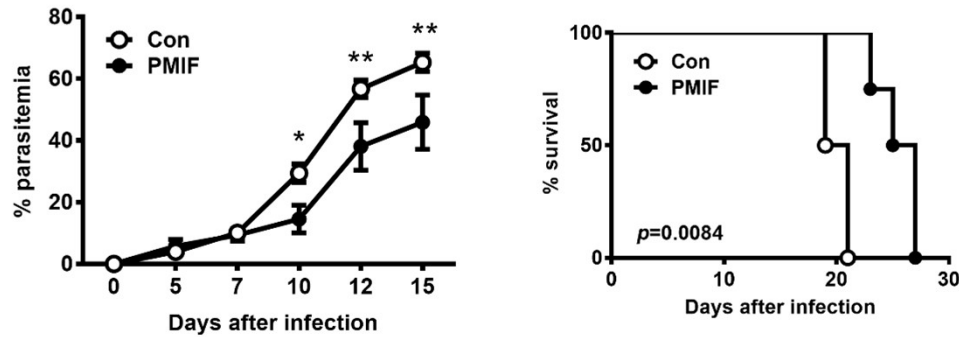**c**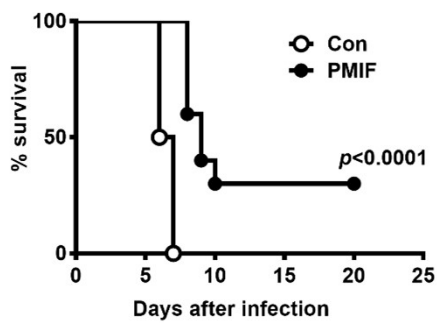

**Supplementary Figure 9. Passive transfer of IgG from PMIF immunized and *PbAWT* infected mice provides partial protection in both BALB/c and C57BL/6J mice.** **a**, IgG isolated from Control (Con) or PMIF immunized (PMIF) and *PbAWT*-infected mice was administered i.p. to naïve BALB/c or C57BL/6J mice followed by *PbAWT* infection. Parasitemia and Kaplan-Meier survival analysis of *PbAWT* infected **b**, BALB/c mice, and **c**, C57BL/6 mice. Data are from two independent experiments (5 mice per group) with *p* values by the Long-rank test (\**p*<0.05, \*\**p*<0.01).

**a**

CD8/CSPtetra FMO

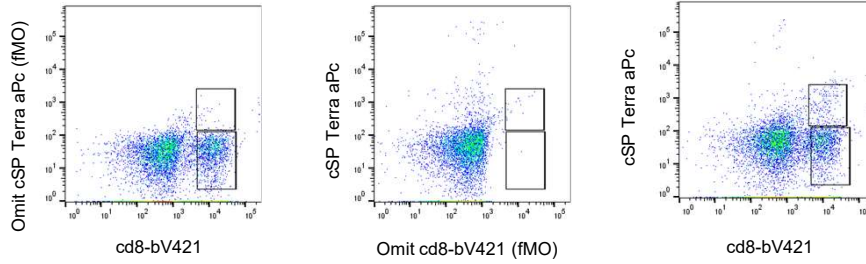

**b**

CD69/KLRG1 FMO

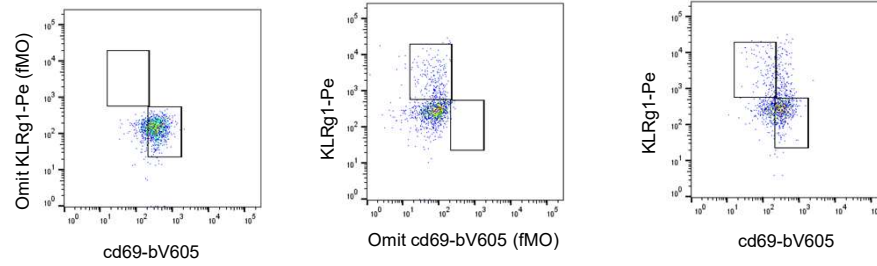

**c**

CD19/IgD FMO

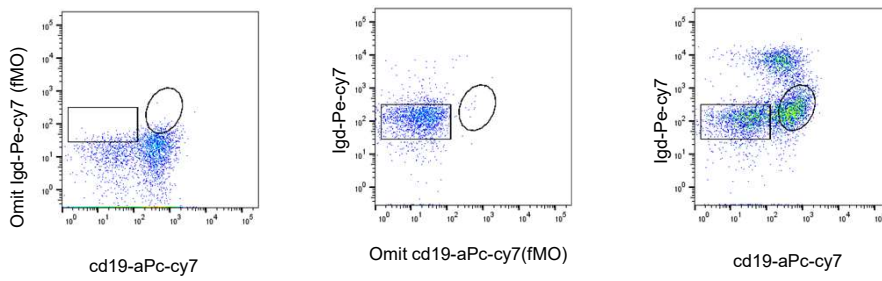

**d**

CD38/GL7 FMO

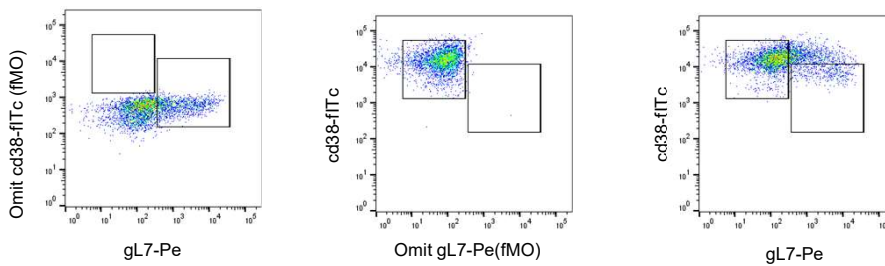

**Supplemental Figure 10. Flow cytometry gating strategy.** FMO-based gate for **a**, CSP-specific CD8<sup>+</sup> T cells, **b**, Trm and Tem CD8<sup>+</sup> T cells, **c**, Memory B cells, and **d**, GC B cells.

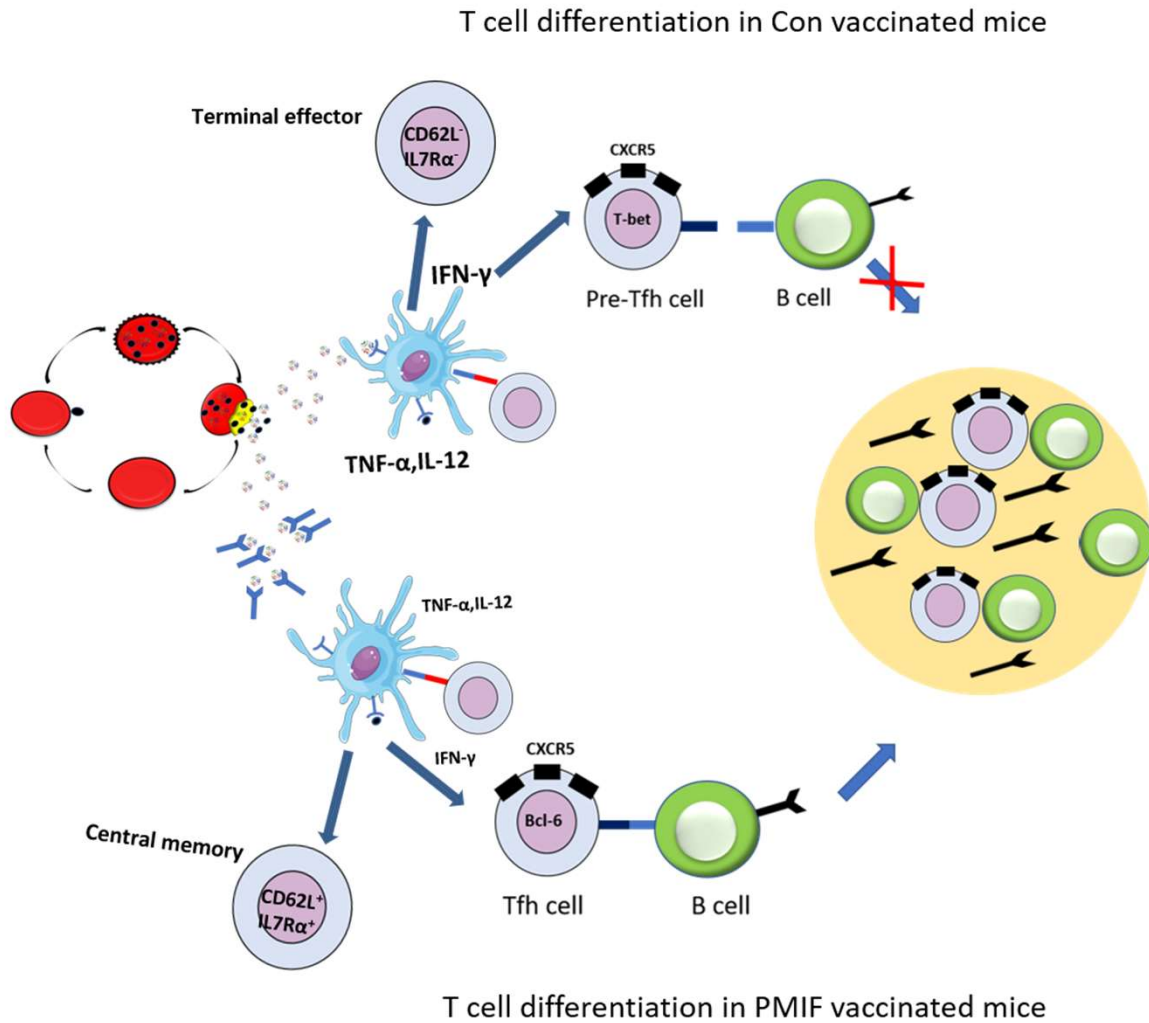

**Supplemental Figure 11. Scheme of PMIF action.** Anti-PMIF antibodies produced in vaccinated mice block the activity of released PMIF, which reduces myeloid cell activation by limiting the binding between PMIF and the host MIF receptor CD74. Reduced PMIF activity decreases host production of pro-inflammatory cytokines, diminishes Th1 responses, and promotes Tfh responses and the recovery of GC.

a

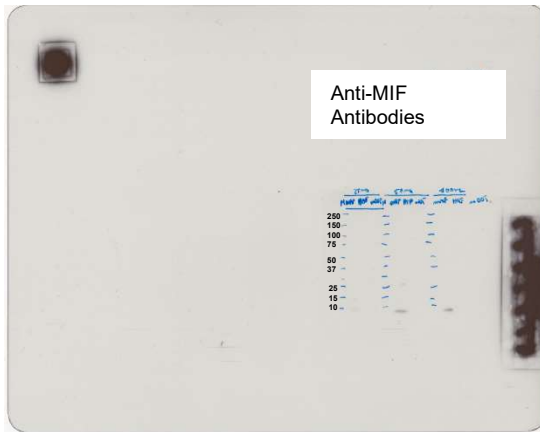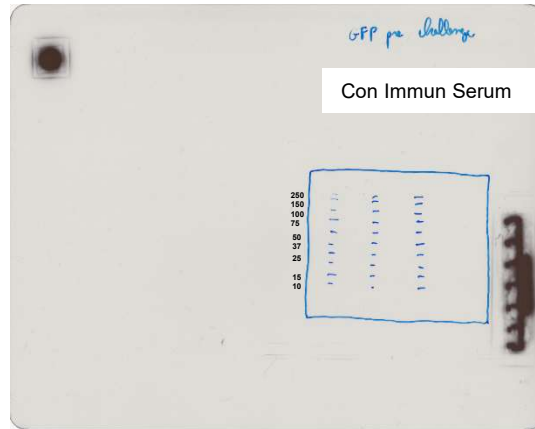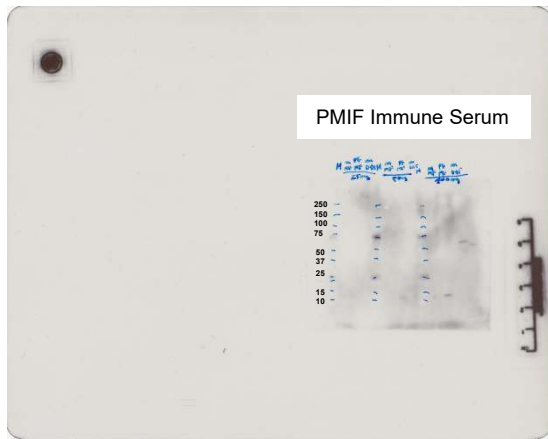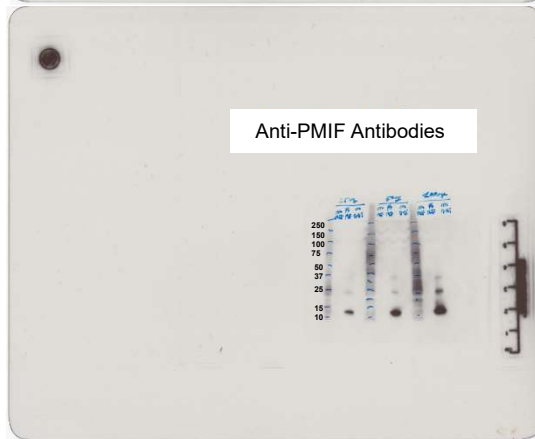

b

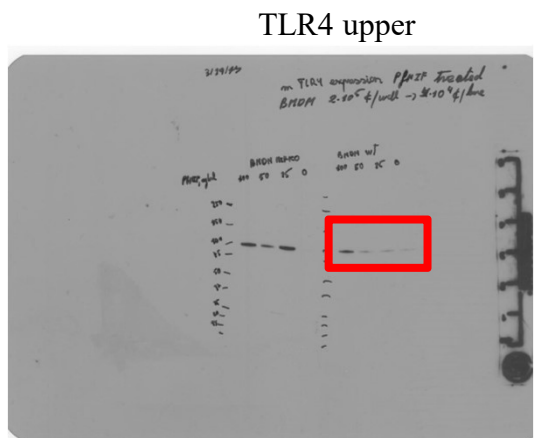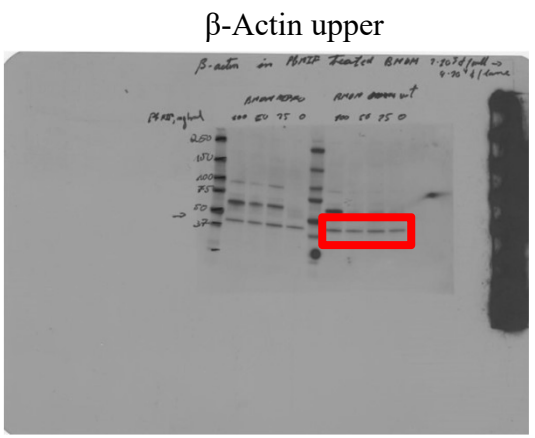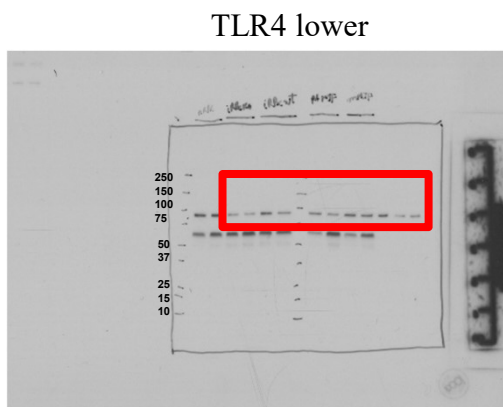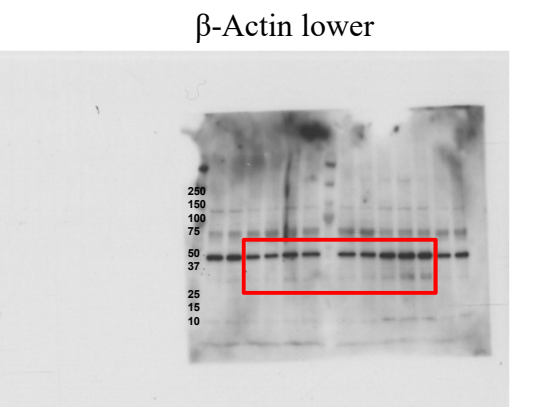

**c**

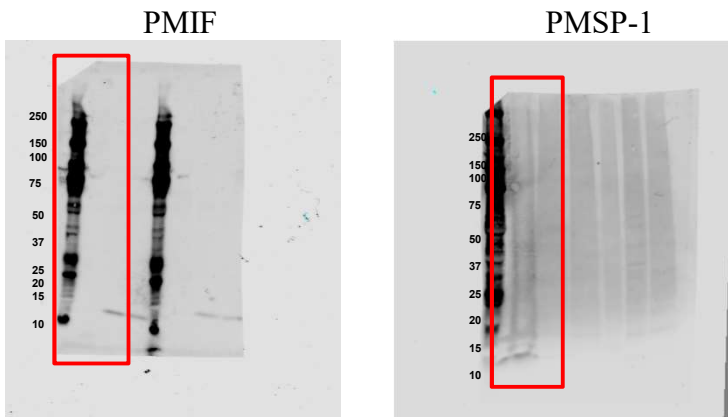

**Supplementary Figure 12. Uncropped Scans Figure for Western Blot. a, Supplementary Figure 4f, b, Supplementary Figure 4g, c, Supplementary Figure 4i.**



| Target | Fluorochrome | Clone      | Isotype                    | Dilution | Provider    |
|--------|--------------|------------|----------------------------|----------|-------------|
| CD3    | APC-Cy7      | 17A2       | Rat IgG2b, κ               | 1/500    | Biolegend   |
| CD4    | FITC         | RM4.4      | Rat IgG2b, κ               | 1/500    | Biolegend   |
| CD45.1 | APC          | A20        | Mouse IgG2a, κ             | 1/1000   | Biolegend   |
| IL-7Ra | Alexa 405    | A7R34      | Rat IgG2b, κ               | 1/500    | eBioscience |
| CD62L  | PE-Cy7       | MEL-14     | Rat IgG2b, κ               | 1/1200   | Biolegend   |
| Ki67   | FITC         | 35         | Mouse IgG <sub>1</sub>     | 1/200    | BD          |
| T-bet  | PerCP-Cy5.5  | 4B10       | Mouse IgG <sub>1</sub> , κ | 1/100    | Biolegend   |
| Bcl6   | APC          | 7D1        | Rat IgG2b, κ               | 1/100    | Biolegend   |
| IFN-γ  | PE/PE-Cy7    | XMG1.2     | Rat IgG <sub>1</sub> , κ   | 1/100    | Biolegend   |
| CD19   | APC-Cy7      | 6D5        | Rat IgG2a, κ               | 1/500    | Biolegend   |
| CD138  | APC          | 281-2      | Rat IgG2a, κ               | 1/500    | Biolegend   |
| IgD    | PE-Cy7       | 11-26c.2a  | Rat IgG2a, κ               | 1/250    | Biolegend   |
| GL7    | PE           | GL7        | Rat IgM, κ                 | 1/250    | Biolegend   |
| CD38   | FITC         | 90         | Rat IgG2a, κ               | 1/500    | eBioscience |
| CD8    | BV421        | 53-6.7     | Rat IgG2a, κ               | 1/500    | Biolegend   |
| CD69   | BV605        | H1.2F3     | Arme Hams IgG              | 1/500    | Biolegend   |
| KLRG1  | PE           | 2F1/ KLRG1 | Syri Hams IgG              | 1/500    | Biolegend   |
| CD44   | FITC         | IM7        | Rat IgG2b, κ               | 1/1000   | Biolegend   |
| CXCR5  | PE           | L138D7     | Rat IgG2b, κ               | 1/500    | Biolegend   |
| PD-1   | BV421        | 29F.1A12   | Rat IgG2a, κ               | 1/250    | Biolegend   |

**Supplementary Table 1. Antibodies for Cytometry**
